# Supplementary material
Source: Royal Society of Chemistry journal article supplement (doi:10.1039/d6ta00443a)
Supplement: d6ta00443a1.pdf [file d6ta00443a1.pdf]

## Supporting Information

### CO<sub>2</sub> electroreduction to ratio-tunable syngas with Cu-In-Ag electrodes: from electronic structure regulation to mechanistic understanding

Jingui Ma<sup>1,2</sup>, Zean Liu<sup>2</sup>, Xiaonan Liu<sup>2</sup>, Mengxuan Kuang<sup>1</sup>, Yuhong Lai<sup>2</sup>, Feiyu Li<sup>2</sup>, Yu Chen<sup>2</sup>, Quan Shi<sup>1</sup>, Yansheng Liu<sup>2</sup>, Junwei Hou<sup>2,\*</sup>

<sup>1</sup> State Key Laboratory of Heavy Oil Processing, China University of Petroleum-Beijing, Beijing 102249, China

<sup>2</sup> State Key Laboratory of Heavy Oil Processing, China University of Petroleum-Beijing at Karamay, Xinjiang 834000, China

\*Corresponding author.

E-mail, [Junweihou@cupk.edu.cn](mailto:Junweihou@cupk.edu.cn)

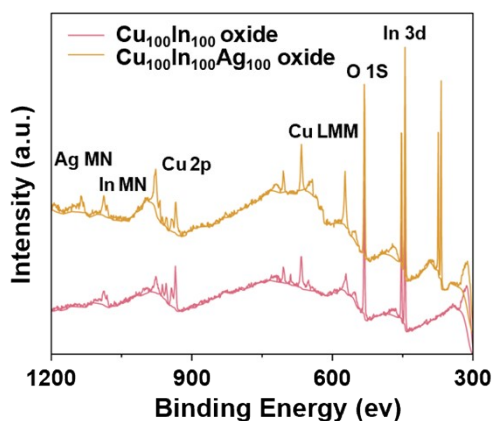

**Fig. S1.** XPS survey spectrum of the Cu<sub>100</sub>In<sub>100</sub>Ag<sub>100</sub> oxide and Cu<sub>100</sub>In<sub>100</sub> oxide catalyst.

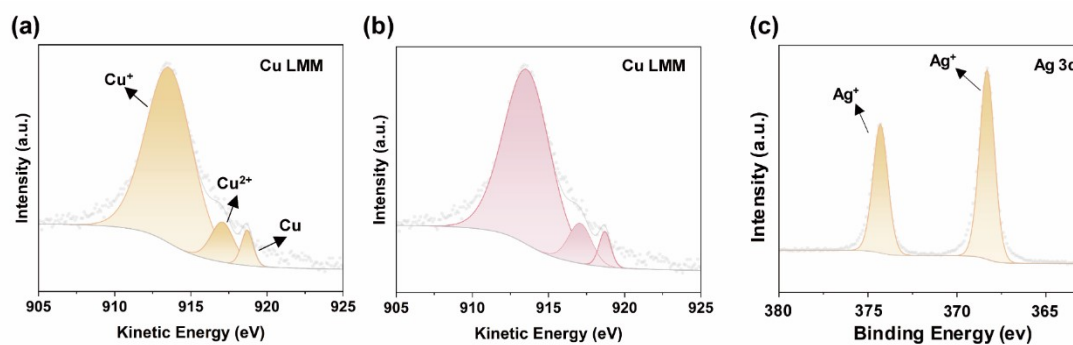

**Fig. S2.** XPS spectrum for Cu LMM of (a) Cu<sub>100</sub>In<sub>100</sub>Ag<sub>100</sub> oxide, (b) Cu<sub>100</sub>In<sub>100</sub> oxide and (c) Ag 3d of the Cu<sub>100</sub>In<sub>100</sub>Ag<sub>100</sub> oxide.

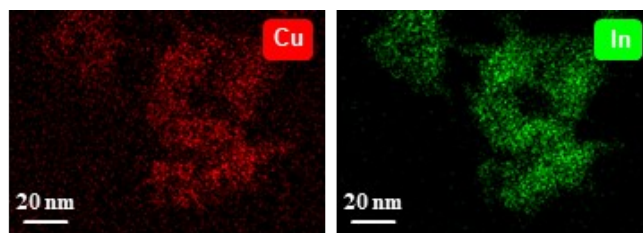

**Fig. S3.** EDX spectroscopy elemental mapping for Cu (red), In (green) of  $\text{Cu}_{100}\text{In}_{100}$  oxide catalyst.

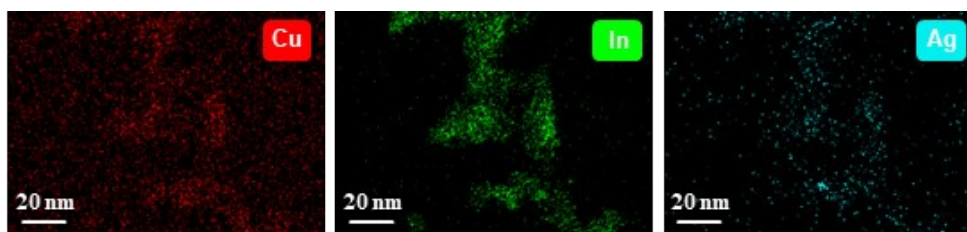

**Fig. S4.** EDX spectroscopy elemental mapping for Cu (red), In (green) and Ag (blue) of  $\text{Cu}_{100}\text{In}_{100}\text{Ag}_{100}$  oxide catalyst.

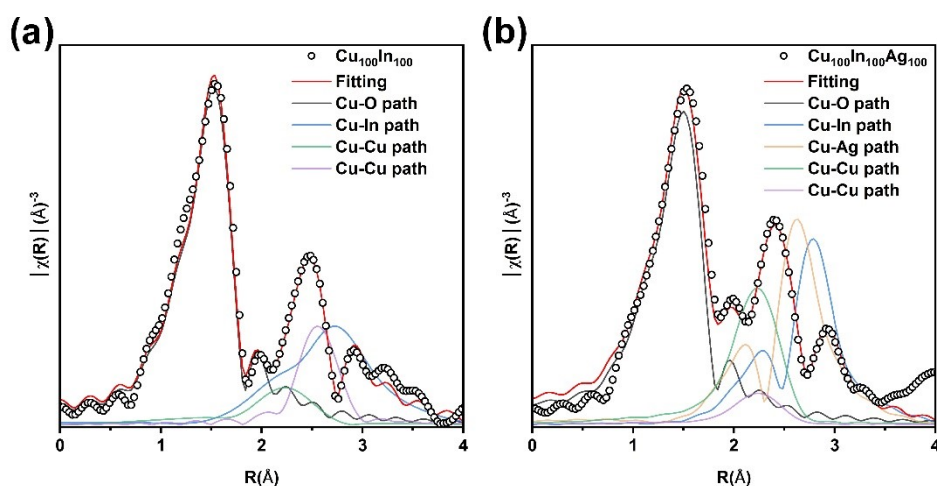

**Fig. S5.** Experimental and fitting spectrum of Cu K-edge in r space of (a)  $\text{Cu}_{100}\text{In}_{100}$ , (b)  $\text{Cu}_{100}\text{In}_{100}\text{Ag}_{100}$

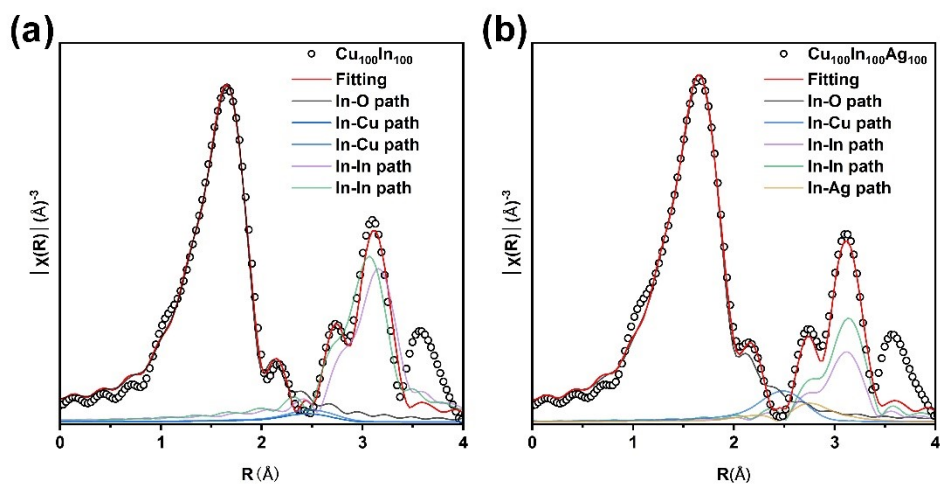

**Fig. S6.** Experimental and fitting spectrum of In K-edge in r space of (a)  $\text{Cu}_{100}\text{In}_{100}$ , (b)  $\text{Cu}_{100}\text{In}_{100}\text{Ag}_{100}$

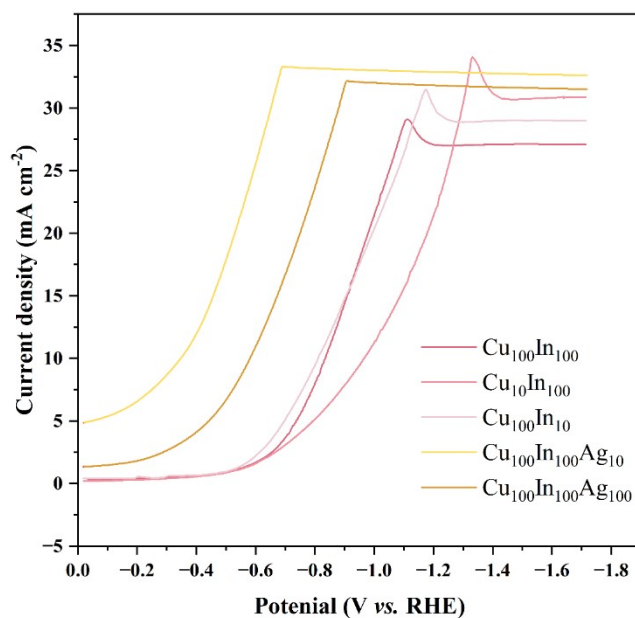

**Fig. S7.** LSV for different catalysts

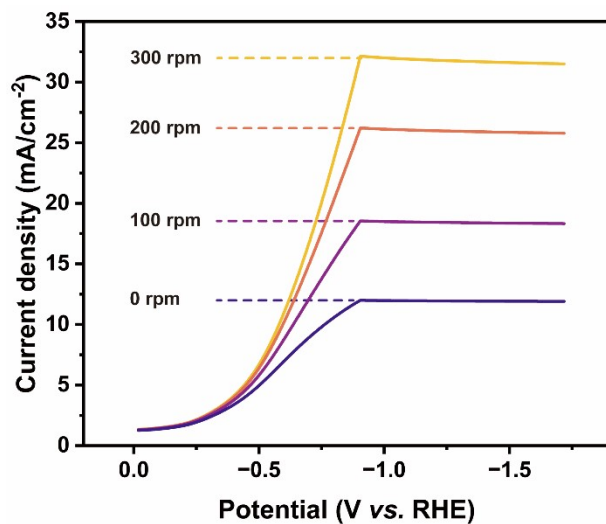

**Fig. S8.** LSV curves of the  $\text{Cu}_{100}\text{In}_{100}\text{Ag}_{100}$  catalyst at different stirring speeds.

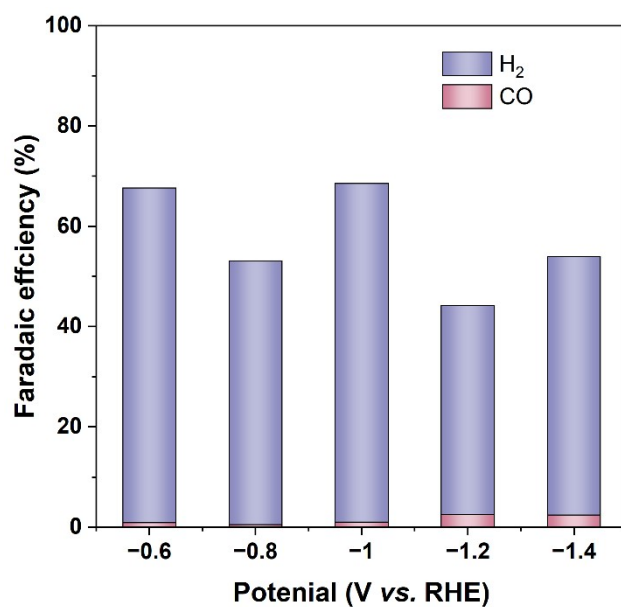

**Fig. S9.** FEs of CO and  $\text{H}_2$  under different applied potentials over pure GDL in 0.1 M  $\text{KHCO}_3$  electrolyte.

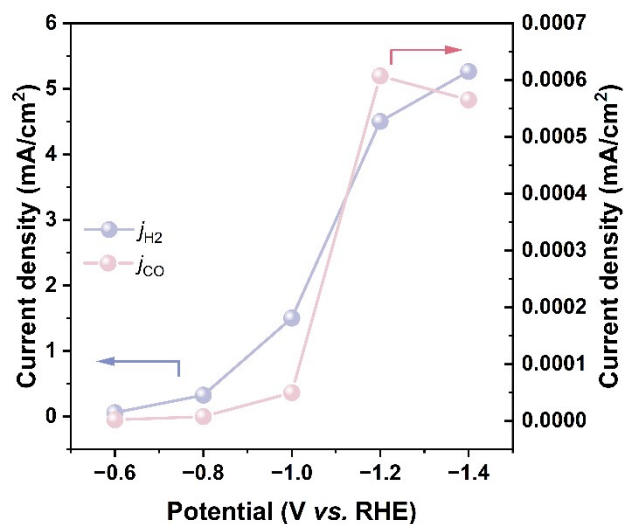

**Fig. S10.** partial current densities of CO and H<sub>2</sub> under different applied potentials over pure GDL in 0.1 M KHCO<sub>3</sub> electrolyte.

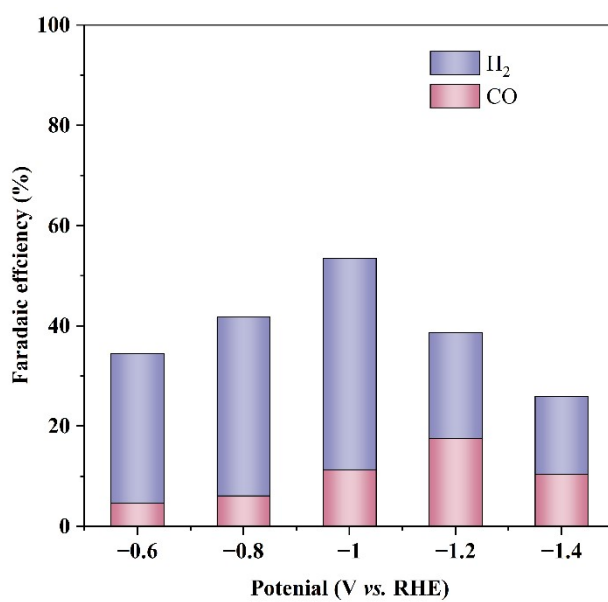

**Fig. S11.** FEs of CO and H<sub>2</sub> under different applied potentials over In NPs in 0.1 M KHCO<sub>3</sub> electrolyte.

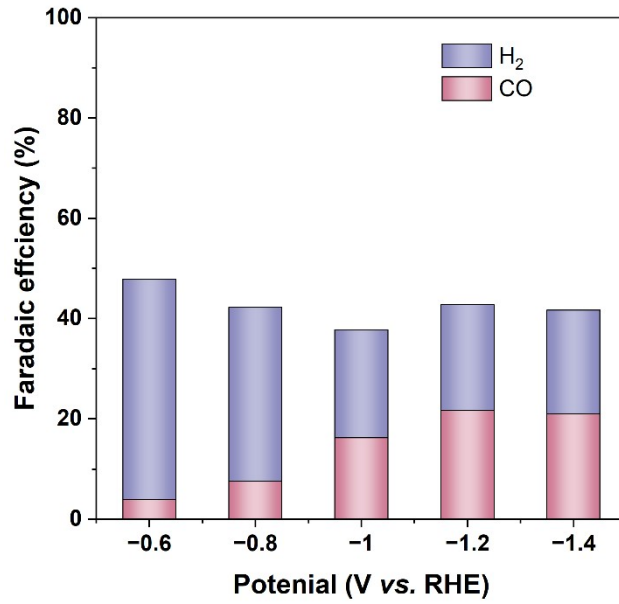

**Fig. S12.** FEs of CO and H<sub>2</sub> under different applied potentials over Cu NPs in 0.1 M KHCO<sub>3</sub> electrolyte.

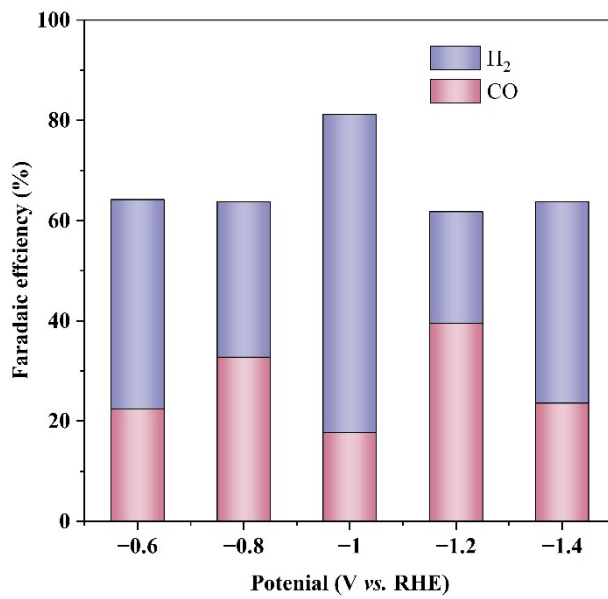

**Fig. S13.** FEs of CO and H<sub>2</sub> under different applied potentials over Cu<sub>10</sub>In<sub>100</sub> in 0.1 M KHCO<sub>3</sub> electrolyte.

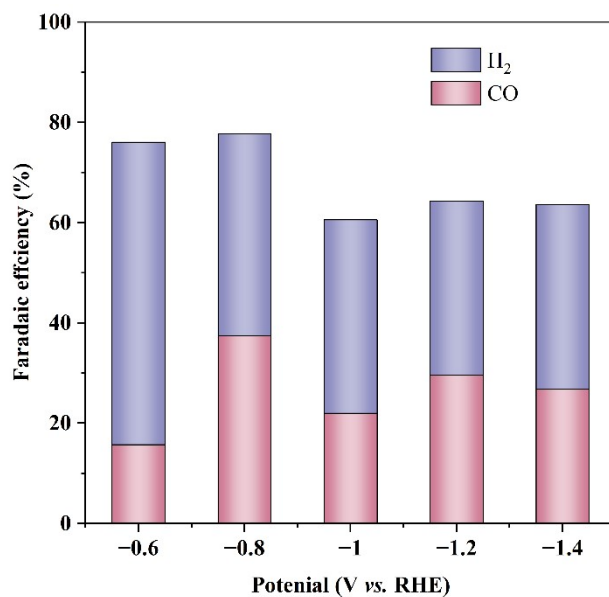

**Fig. S14.** FEs of CO and H<sub>2</sub> under different applied potentials over Cu<sub>100</sub>In<sub>10</sub> in 0.1 M KHCO<sub>3</sub> electrolyte.

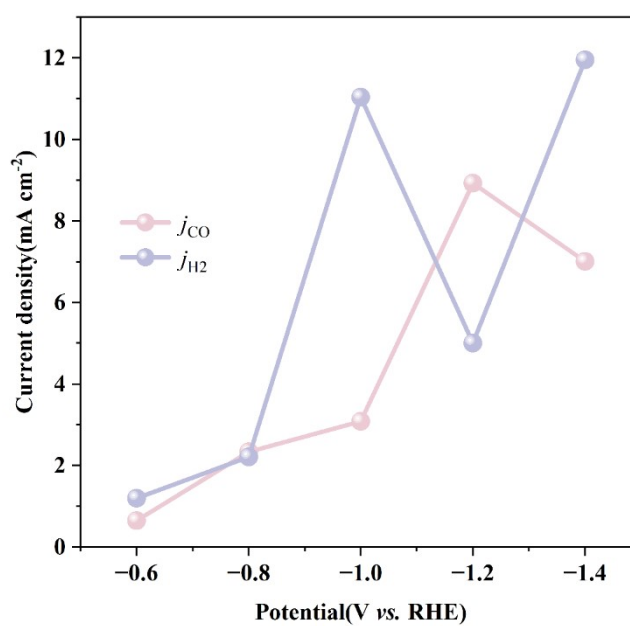

**Fig. S15.** Partial current densities of CO and H<sub>2</sub> under different applied potentials over Cu<sub>100</sub>In<sub>100</sub> in 0.1 M KHCO<sub>3</sub> electrolyte.

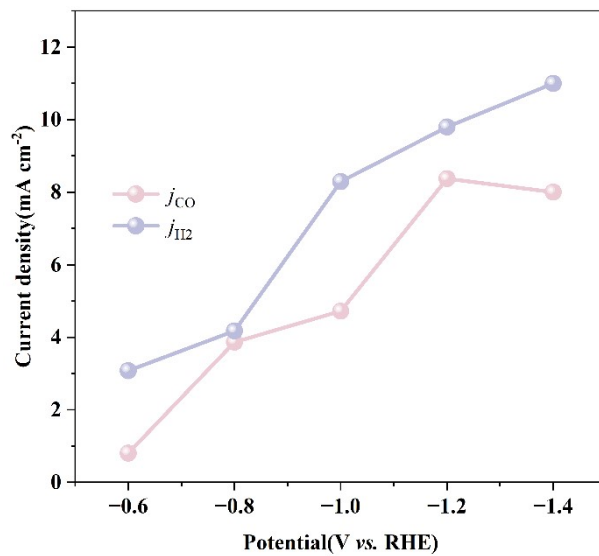

**Fig. S16.** Partial current densities of CO and H<sub>2</sub> under different applied potentials over Cu<sub>100</sub>In<sub>10</sub> in 0.1 M KHCO<sub>3</sub> electrolyte.

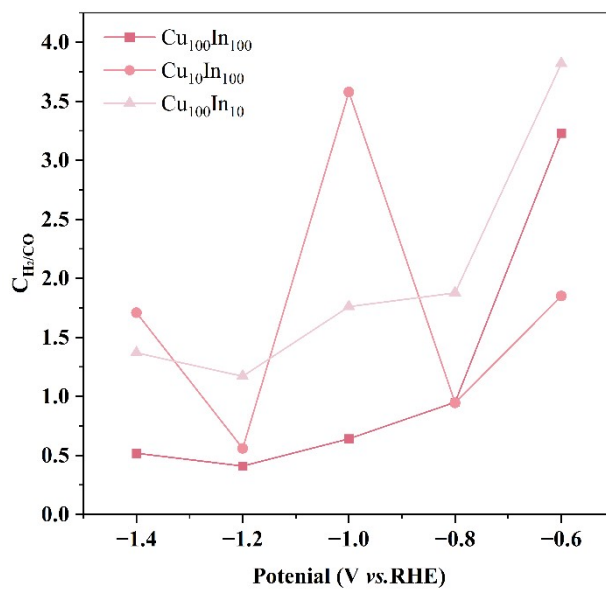

**Fig. S17.** Ratio of H<sub>2</sub>/CO over different catalysts in 0.1 M KHCO<sub>3</sub> electrolyte.

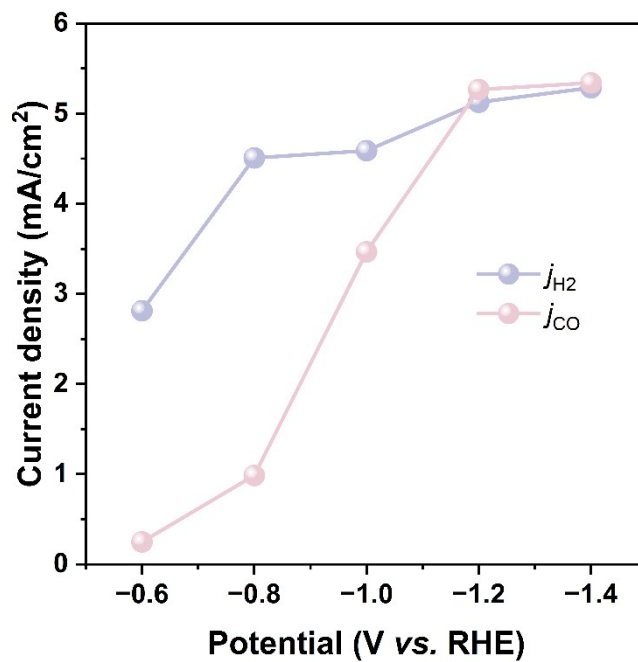

**Fig. S18.** Partial current densities of CO and H<sub>2</sub> under different applied potentials over Cu<sub>100</sub>Ag<sub>100</sub> in 0.1 M KHCO<sub>3</sub> electrolyte.

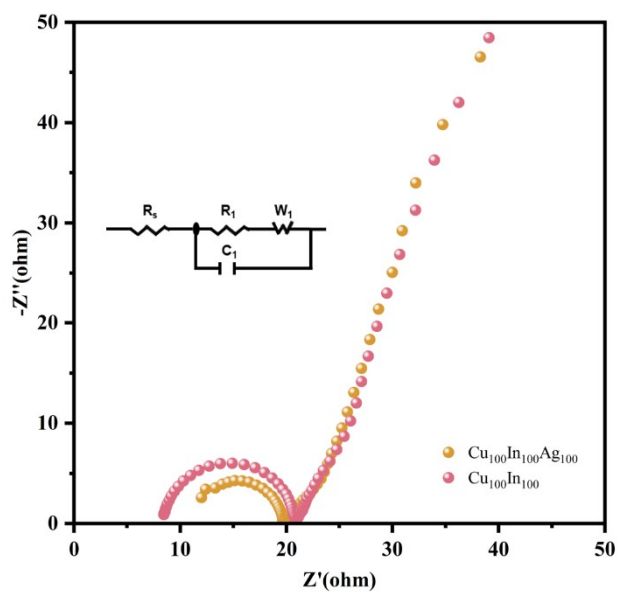

**Fig. S19.** EIS of the Cu<sub>100</sub>In<sub>100</sub>Ag<sub>100</sub> and Cu<sub>100</sub>In<sub>100</sub> catalyst.

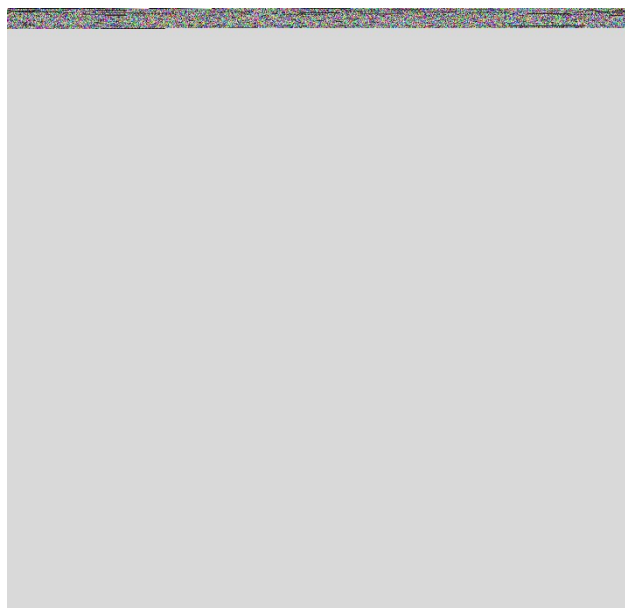

**Fig. S20.** FEs of CO and H<sub>2</sub> under different applied potentials over Cu<sub>100</sub>Ag<sub>100</sub> in 0.1 M KHCO<sub>3</sub> electrolyte.

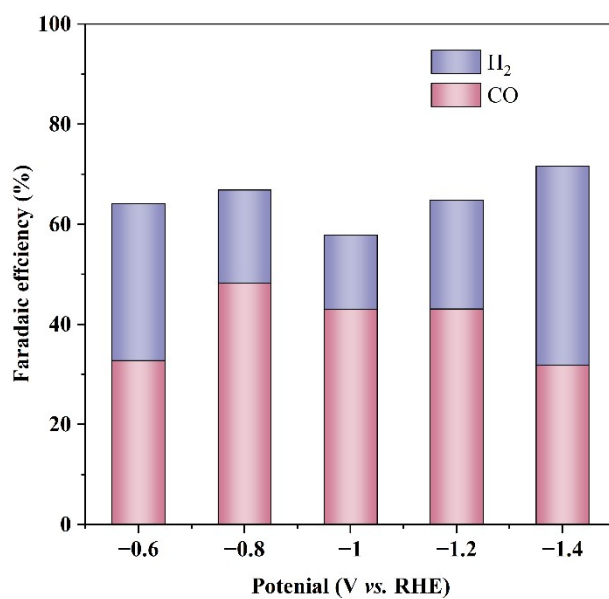

**Fig. S21.** FE of CO and H<sub>2</sub> under different applied potentials over Cu<sub>100</sub>In<sub>100</sub>Ag<sub>10</sub> in 0.1 M KHCO<sub>3</sub> electrolyte.

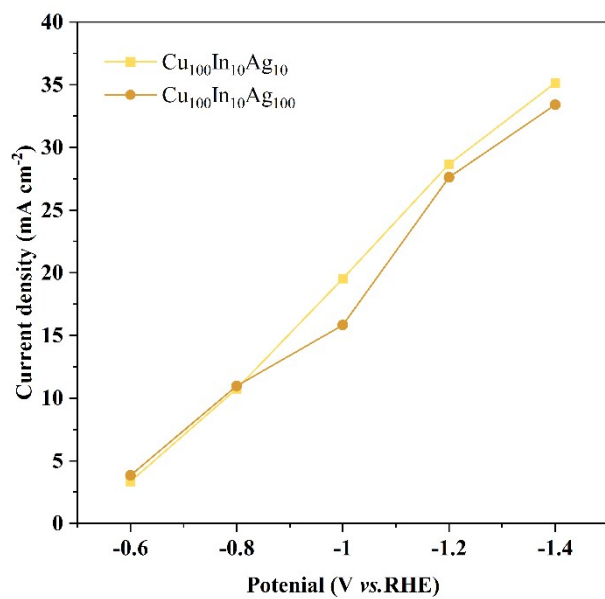

**Fig. S22.** Total current density over Cu<sub>100</sub>In<sub>100</sub>Ag<sub>100</sub> and Cu<sub>100</sub>In<sub>100</sub> catalyst in 0.1 M KHCO<sub>3</sub> electrolyte.

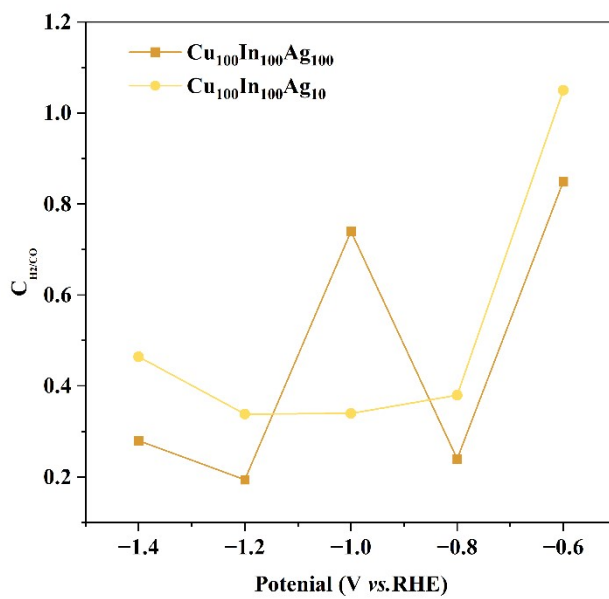

**Fig. S23.** Ratio of H<sub>2</sub>/CO over different catalysts in 0.1 M KHCO<sub>3</sub> electrolyte.

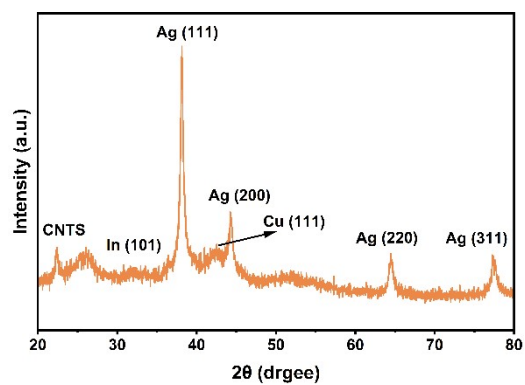

**Fig. S24.** XRD patterns of  $\text{Cu}_{100}\text{In}_{100}\text{Ag}_{100}$  after an 8-hour stability test.

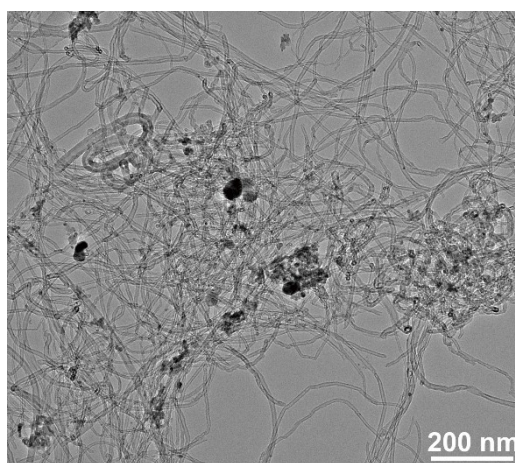

**Fig. S25.** HRTEM images of  $\text{Cu}_{100}\text{In}_{100}\text{Ag}_{100}$  after an 8-hour stability test.

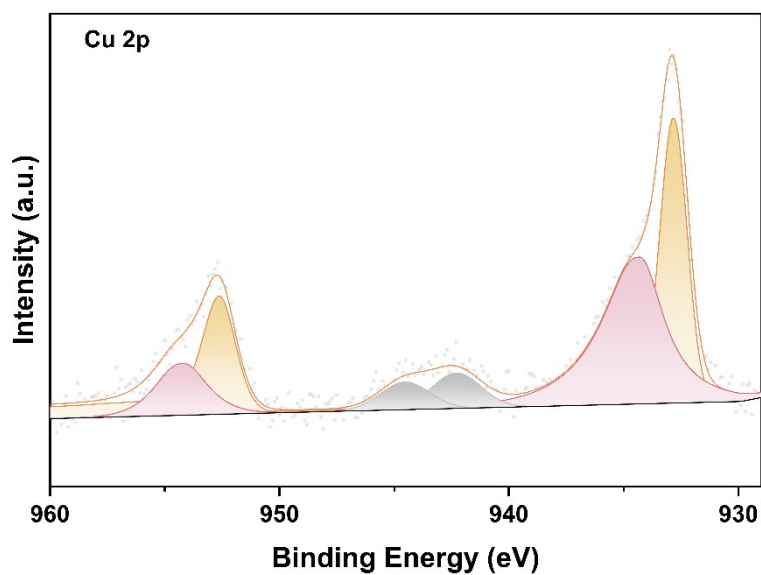

**Fig. S26.** Cu 2p XPS spectra of  $\text{Cu}_{100}\text{In}_{100}\text{Ag}_{100}$  after an 8-hour stability test.

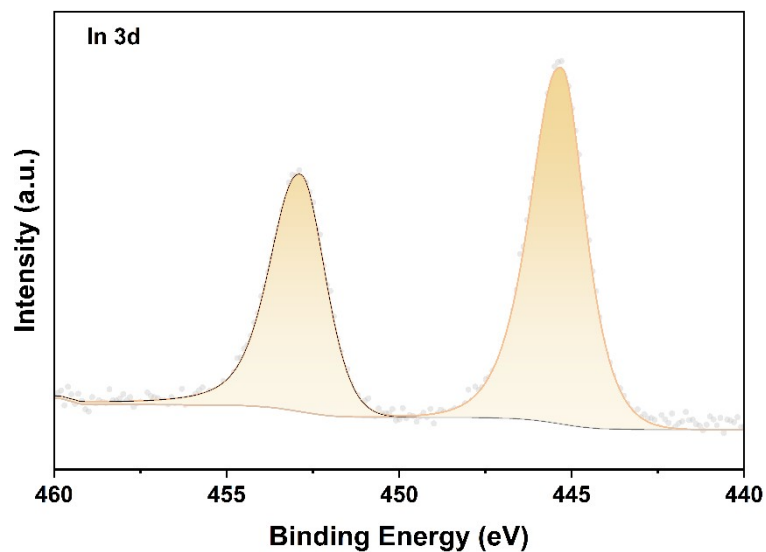

Fig. S27. In 3d XPS spectra of  $\text{Cu}_{100}\text{In}_{100}\text{Ag}_{100}$  after an 8-hour stability test.

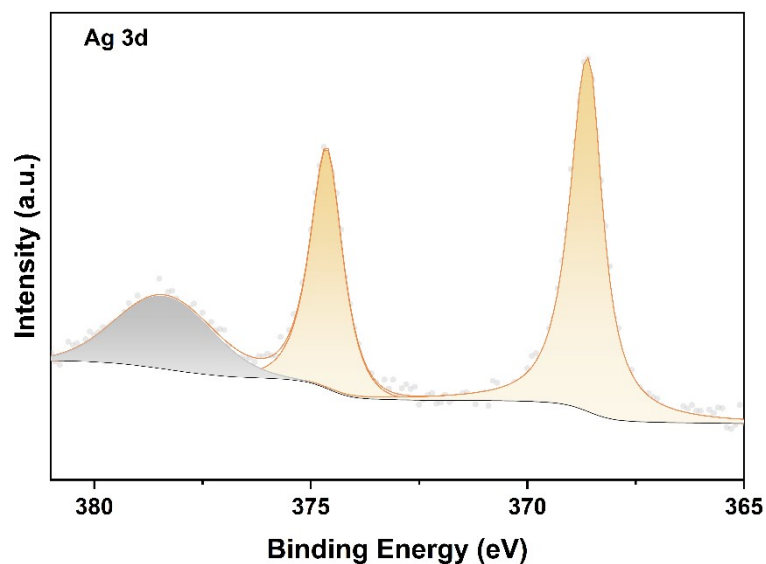

Fig. S28. Ag 3d XPS spectra of  $\text{Cu}_{100}\text{In}_{100}\text{Ag}_{100}$  after an 8-hour stability test.

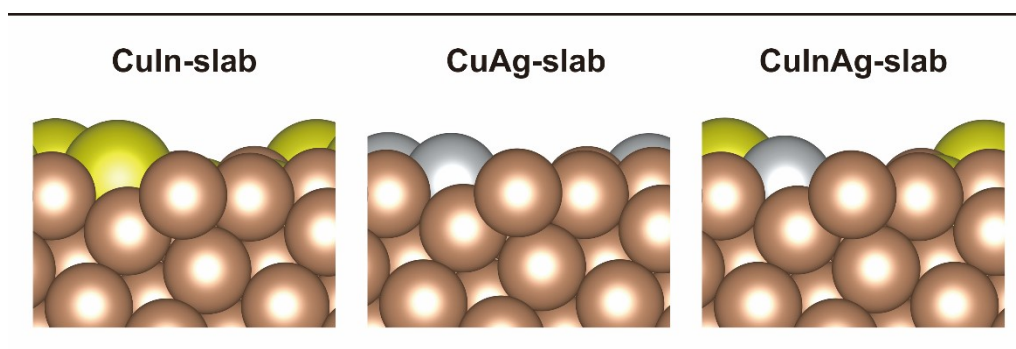

Fig. S29. Optimised structures of  $\text{Cu}_{100}\text{In}_{100}$  and  $\text{Cu}_{100}\text{In}_{100}\text{Ag}_{100}$ .

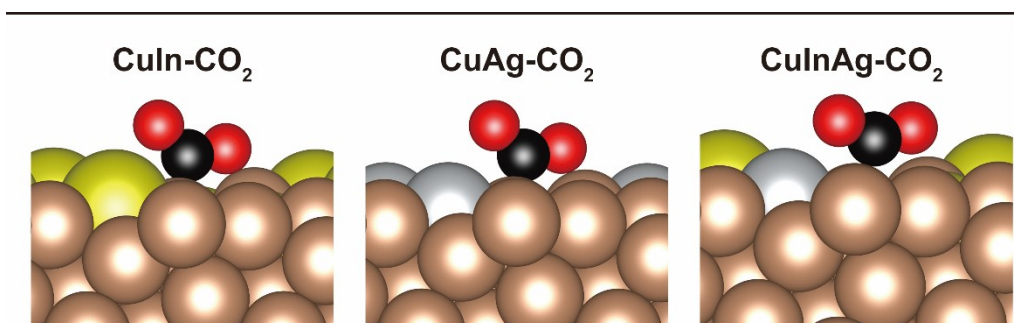

**Fig. S30.** Adsorption configurations of \*CO<sub>2</sub> intermediates.

---

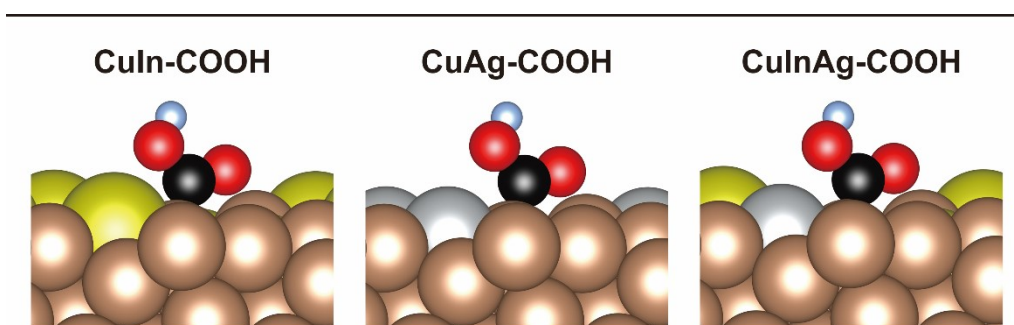

**Fig. S31.** Adsorption configurations of \*COOH intermediates.

---

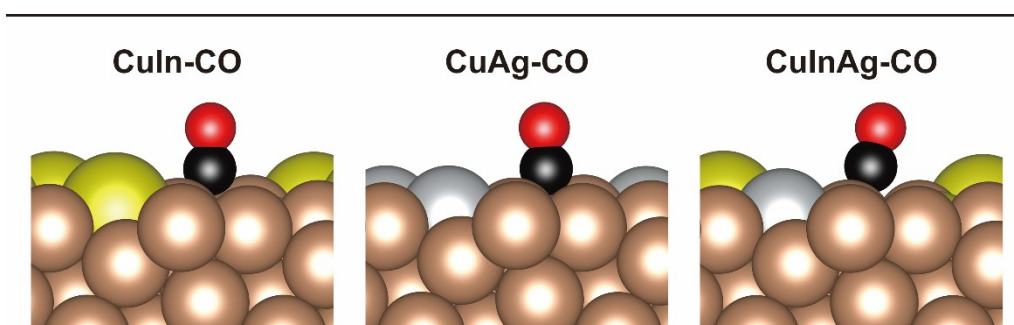

**Fig. S32.** Adsorption configurations of \*CO intermediates.

---

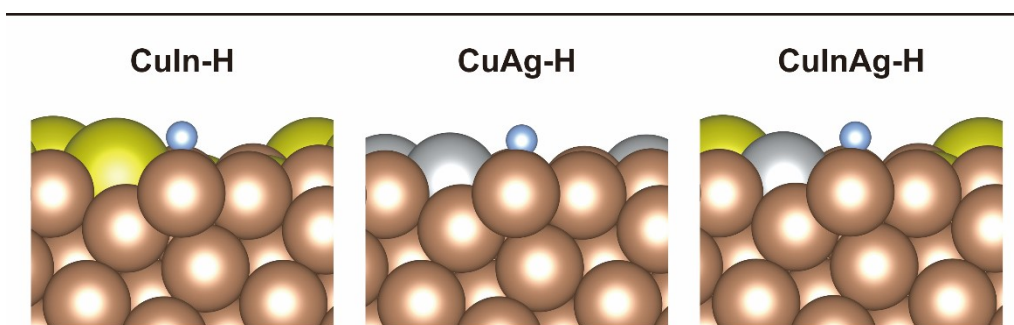

**Fig. S33.** Adsorption configurations of \*H intermediates.

---

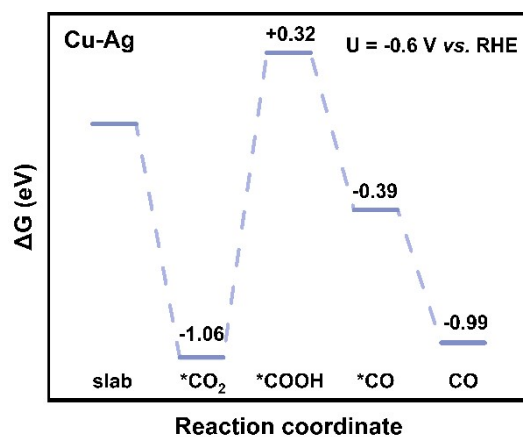

Fig. S34. Free-energy diagrams for CO<sub>2</sub> to CO on simulated Cu-Ag surfaces.

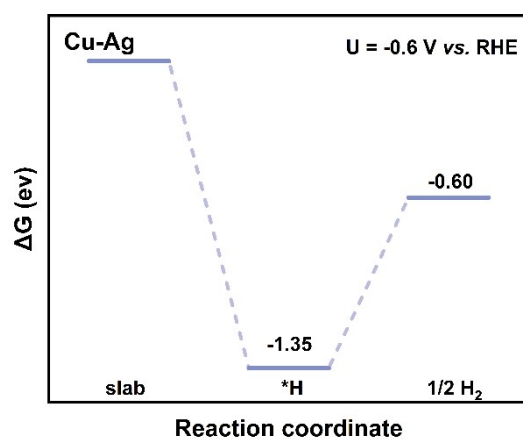

Fig. S35. Free-energy diagrams for H<sub>2</sub> evolution on simulated Cu-Ag surfaces.

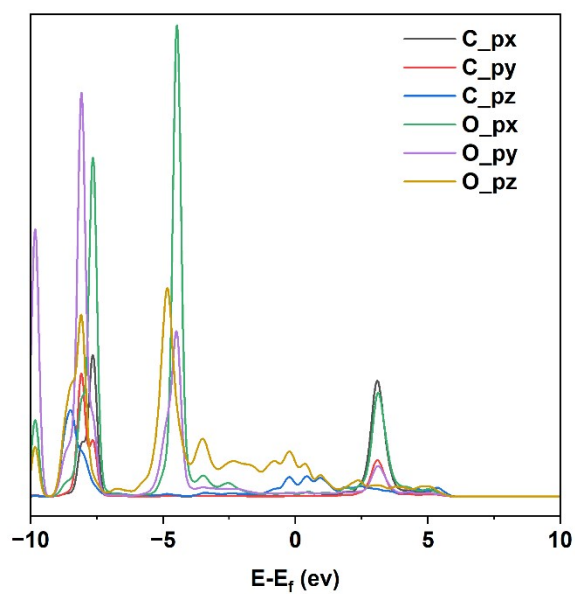

Fig. S36 The PDOS of CO<sub>2</sub> adsorbed on Cu-In-Ag surfaces.

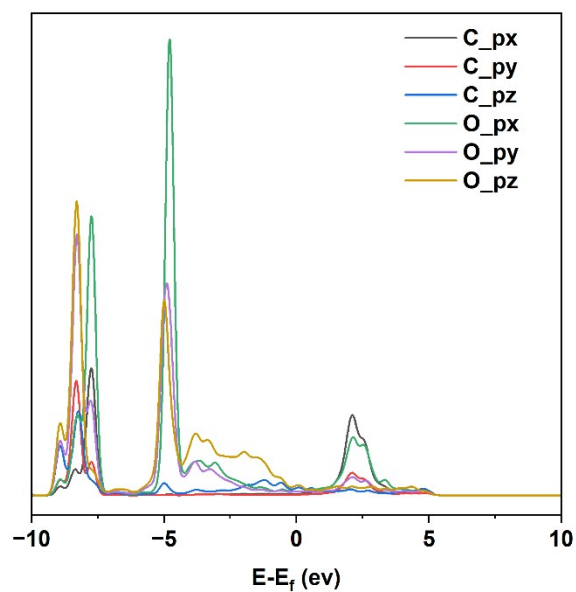

**Fig. S37.** The PDOS of CO<sub>2</sub> adsorbed on Cu-In surfaces.

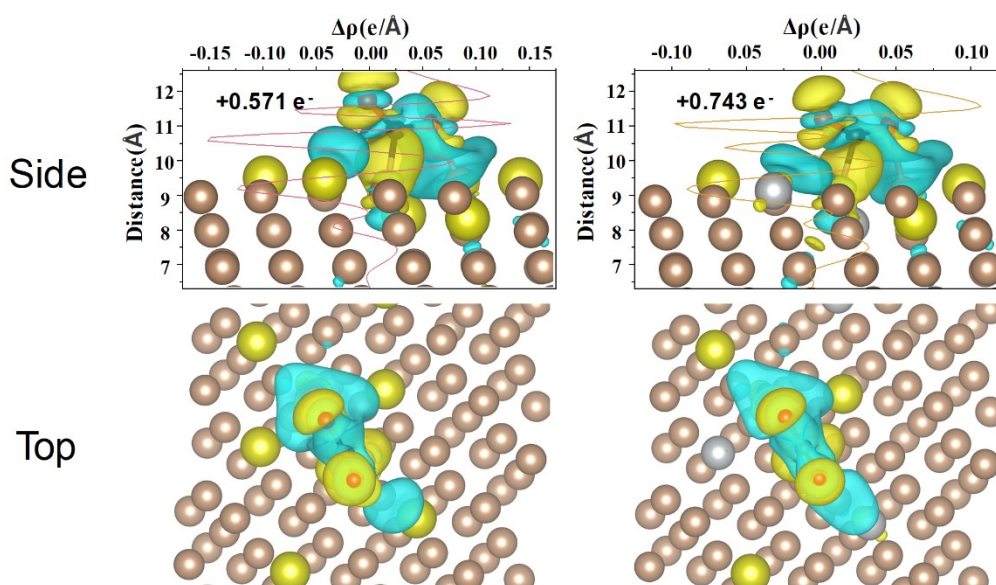

**Figure S38.** The PDOS and bader charge of CO<sub>2</sub> adsorbed on Cu-In and Cu-In-Ag surfaces.

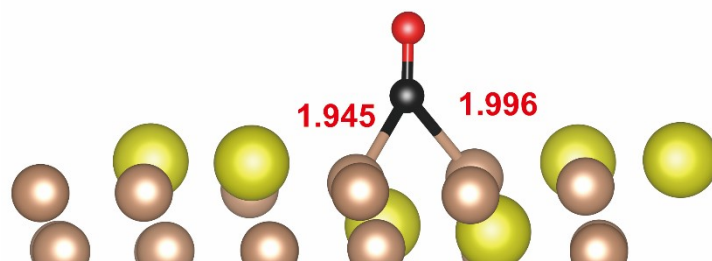

**Fig. S39.** structures of CO Adsorption on Cu-In surfaces.

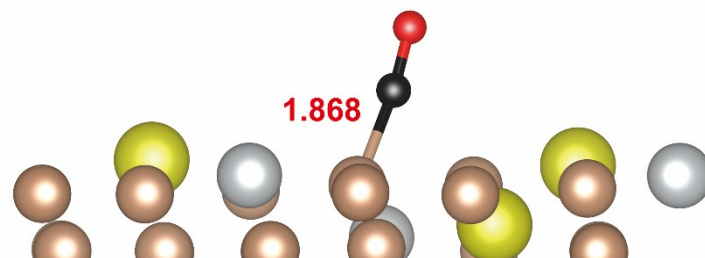

**Fig. S40.** structures of CO Adsorption on Cu-In-Ag surfaces.

**Table S1.** Electrochemical impedance parameters obtained by fitting the EIS data of  $\text{Cu}_{100}\text{In}_{100}$  and  $\text{Cu}_{100}\text{In}_{100}\text{Ag}_{100}$  electrodes

| Equivalent Circuit Element | $\text{Cu}_{100}\text{In}_{100}$    | $\text{Cu}_{100}\text{In}_{100}\text{Ag}_{100}$ |
|----------------------------|-------------------------------------|-------------------------------------------------|
| <b><math>R_s</math></b>    | 8.45( $\pm 0.8\%$ )                 | 11.08( $\pm 2.4\%$ )                            |
| <b><math>R_1</math></b>    | 7.5( $\pm 0.9\%$ )                  | 7.6( $\pm 3.1\%$ )                              |
| <b>W1-R</b>                | 97.84( $\pm 2.8\%$ )                | 143.7( $\pm 2.0\%$ )                            |
| <b>W1-T</b>                | 0.38( $\pm 2.7\%$ )                 | 20.31( $\pm 3.1\%$ )                            |
| <b>W1-P</b>                | 0.69( $\pm 0.7\%$ )                 | 0.66( $\pm 0.7\%$ )                             |
| <b>C1</b>                  | 2.14E <sup>-7</sup> ( $\pm 2.3\%$ ) | 5.17E <sup>-8</sup> ( $\pm 7.7\%$ )             |

**Table S2.** The comparison of the syngas production performance for the multiple catalyst in H-cell reported in recent literature.

| Catalyst                                              | Electrolyte                | Potential<br>(vs. RHE) | $j_{\text{Total}}$<br>(mA/cm <sup>2</sup> ) | Ratio<br>H <sub>2</sub> /CO | $j_{\text{H}_2}$<br>(mA / cm <sup>2</sup> ) | $j_{\text{CO}}$<br>(mA / cm <sup>2</sup> ) | Ref.             |
|-------------------------------------------------------|----------------------------|------------------------|---------------------------------------------|-----------------------------|---------------------------------------------|--------------------------------------------|------------------|
| Cu <sub>100</sub> In <sub>100</sub> Ag <sub>100</sub> | 0.1 M<br>KHCO <sub>3</sub> | -0.6 V                 | 4.91                                        | 0.85                        | 2.26                                        | 2.65                                       | <i>This work</i> |
| AuZn-3/ZnO                                            | 0.1 M<br>KHCO <sub>3</sub> | -0.7 V                 | 0.68                                        | 0.49                        | 0.22                                        | 0.46                                       | [52]             |
| NiPC@FeNc                                             | 0.5 M<br>KHCO <sub>3</sub> | -0.6 V                 | 4.36                                        | 0.61                        | 1.65                                        | 2.71                                       | [53]             |
| Cu <sub>4</sub> In <sub>1</sub> /Bp-53                | 0.5 M<br>KHCO <sub>3</sub> | -0.6 V                 | 4.60                                        | 1.60                        | 2.83                                        | 1.77                                       | [54]             |
| R-Cu-500                                              | 0.1 M<br>KHCO <sub>3</sub> | -1.0 V                 | 6.00                                        | 2                           | 4.00                                        | 2.00                                       | [55]             |
| BPN-3Dp-CCE                                           | 0.1 M<br>KHCO <sub>3</sub> | -0.6 V                 | 0.05                                        | 0.32                        | 0.01                                        | 0.04                                       | [56]             |
